# Supplementary material for: Vectorization of ultrasound-responsive nanoparticles in placental mesenchymal stem cells for cancer therapy
Source: Royal Society of Chemistry journal article supplement (doi:10.1039/c7nr01070b), 2017-01-01
Supplement: c7nr01070b1.pdf [file c7nr01070b1.pdf]

## Vectorization of ultrasound-responsive nanoparticles in placental mesenchymal stem cells for cancer therapy

Juan L. Paris, Paz de la Torre, M. Victoria Cabañas, Miguel Manzano, Montserrat Grau, Ana I. Flores\* and María Vallet-Regí\*

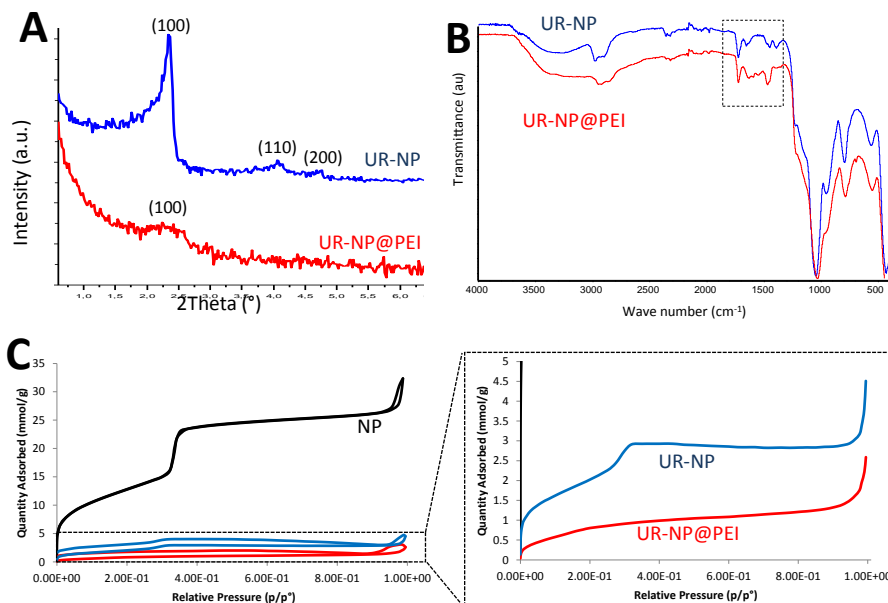

**Figure S1.** Characterization of Mesoporous Silica Nanoparticles: Small Angle XRD pattern (A), FTIR spectra (B) and N<sub>2</sub> adsorption-desorption isotherms (C).

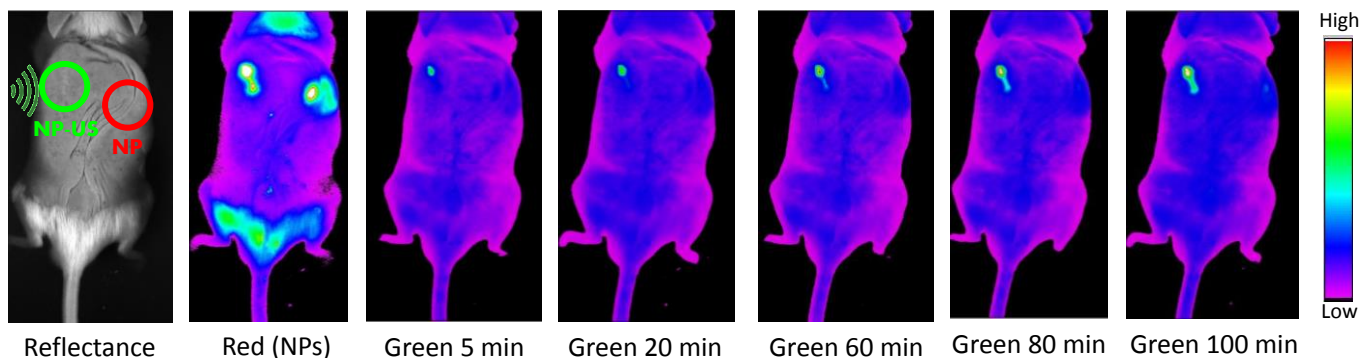

**Figure S2.** *In vivo* fluorescence of subcutaneously injected UR-NPs@PEI (red channel) and calcein produced after calcein-AM release at different times after ultrasound application (1 MHz, 3 W cm<sup>-2</sup>, 10 min) (green channel).

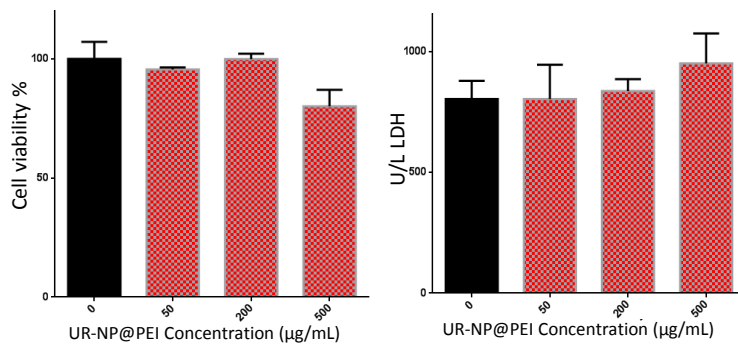

Figure S3. Cytotoxicity assay in DMSCs of UR-NP@PEI at different concentrations after 24 h measured by MTS reduction (left); LDH release by DMSCs with internalized UR-NP@PEI at different concentrations after 24 h. (Data presented as Mean  $\pm$  SD, N = 3).

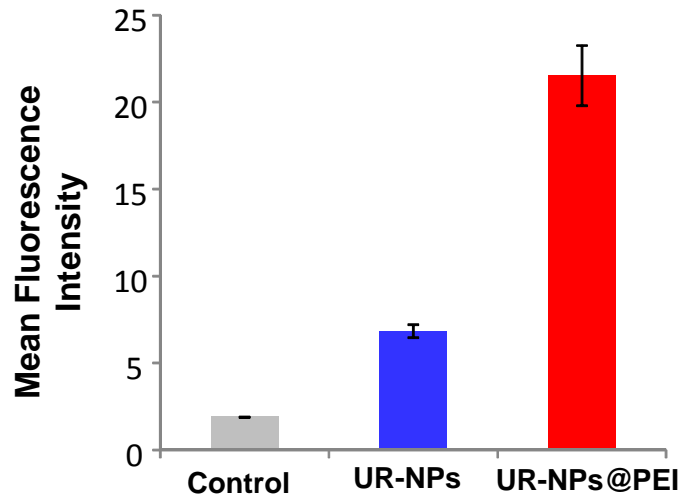

Figure S4. Flow-cytometry data regarding UR-NPs and UR-NPs@PEI uptake shown as Mean Fluorescence Intensity (a.u.). (Data presented as Mean  $\pm$  SD, N = 3).

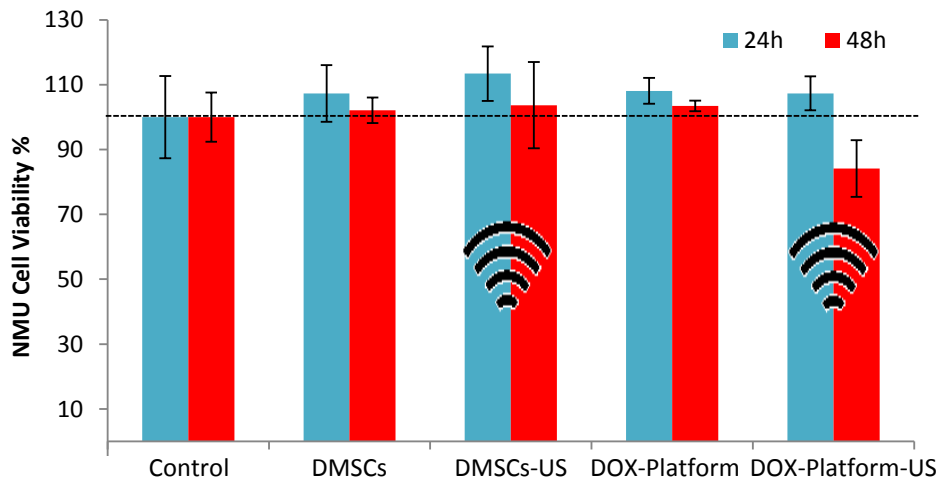

Figure S5. Cytotoxicity assay of NMU cells after co-culture with DMSCs or with DOX-Platform (with or without Ultrasound application) measured by Alamar Blue test. DMSCs to NMU ratio was 1:5. (Data are Means  $\pm$  SD, N = 3).
